# Supplementary material for: China's Telerehabilitation Paradox: A National Survey on the Awareness-to-Practice Gap and Structural Barriers
Source: Research Square preprint supplement (doi:10.21203/rs.3.rs-7924812/v1), 2026-01-28
Supplement: Supplementary file 1 [file f4388878ed1f5c0baf3ac673.docx]

**Appendix：**Survey questions：

Part A: demographic data via multiple-choice and semi-closed questions

1. What is your Gender？

A.Female B: Male

1. How old are you？

A.18-29 B.30-44 C.45-60 D >60

1. What is your highest level of Education？

B: College degree or below A: Bachelor’s degree B: Master’s degree C: Doctor of philosophy D: Others; please specify

1. What is your current profession?

A: University student B: University educator B: health worker(personal studio) C:Clinical rehabilitation professionals (public hospital or private clinic) D:manager E: Others; please specify _______________

1. How long have you been working as a PT？

A: No working experience B <1years B: 1-5 years C: 6-10 years D: > 10 years

1. Where is your current working city in China？
2. First-tier cities BNew-first tier city: Second-tier cities C: Third-tier cities D: Fourth-tier cities D Fifth-tier cities
3. how much time do you spend treating patients each day?

A.0 B: 0< x<5 hrs C5-6hrs C7-8hrs D>8hrs

1. What is your Level of the registered rehabilitation professionals in China？

A The Junior rehabilitation therapist B. The intermediate rehabilitation therapist C.The Senior rehabilitation therapist D The rehabilitiaton physician E:Others; please specify

1. What is your Working status？

A: Full-time work B: Part-time work D Currently not work

1. What working setting do you work in?
2. Hospitals (public or provate) B. Private businesses (including companies, private clinics, fitness studios, etc.) C: University or Schools D: Curretnly not work
3. What kind of patient do you most treat?

A. Pediatrics B: Gerontology C: Woking adults D: Post-natal women E: Post-operate patients F: stroke patients G: The disabled H Currently not work I:Others; please specify ________

1. What kind of techniques do you commonly use to treat patients?

A: Patient education B. Manual therapy C: Exercise therapy C: EPAs E: Traditional Chinese medicine(e.g Acupuncture and cupping) F Currently not work H: others; please specify________

Part B: Questions specific to current application status and future implementation of physiotherapy.

1. Do you have any prior knowledge or awareness regarding Telemedicine or Telerehabilitation？

A: No B: Yes, but never used before C: Yes, knew it before 2020 and kept using it C: Yes. used since 2020

1. In what way would you commonly delivery telerehabilitation?

A: Only do offline, have never used telerehabilitation B Telephone C: SMS service D:e-mail: EMobile diagnostic and treatment applications F: weable deviced G Video Conderencing (Tencent meeting, zoom, etc) H: others; please specify

1. Which of the following approaches do you think could be better applied to telerehabilitation?

A. scales/questionnaires B. text communication C.video conferencing D. mobile app

E. wearable devices to assess physical activity and function F. AI artificial intelligence consultation system G. Others (please specify)

1. What area do you think that Telerehabilitation can be used in rehabilitation?

A: Musculoskeletal B: Cardiorespiratory D: Neurology E: Chronic disease F：post operation E:sports injury D: Others; please specify_______________

1. What do you think are the advantages of telerehabilitation?

A. increase patients’ access to treatment B. save patients’ commuting time C: monitor patient treatment in a more effective wayD.facilitate data sharing between therapists (e.g., medical history, diagnosis and treatment process E increase diversity of treatments F. Other (please specify) ________

1. What do you think are the disadvantages of telerehabilitation?

A.information privacy and security of patients B: Poor treatment effect C.operation is complicated and timely D.influence therapists to communicate with patients and establish a good doctor-patient relationship E.limiting technique use of therapists F.Other (please specify) ________

1. What is your attitude towards the development of telerehabilitation in China? A. Be Possitive. B. Be neutral C. Be negative
2. Willingness to work with Telerehabilitation /acceptance

A: Entire working hours B: C: <1 hours per working day D: 1-3 hours per working day E>3 hours per working day F not at all

1. What do you think would be the appropriate charge fee for one hour session though telerehabilitation
2. <300RMB B 300-500RMB C 600-800. RMB D 900-1500RMB E: Charge fee varies, depending on the rehabilitation effect.
3. What do you think would affect the implementation of Telerehabilitation

A: Policy B: Patient Value & Preferences C: Physiotherapists’ expertise D Maturity and cost of devices E：Health ensurance coverage F:Others; please specify
